# Supplementary material
Source: PubMed Central journal article supplement (PMC6566541)
Supplement: PRO-28-1290-s001.pdf [file PRO-28-1290-s001.pdf]

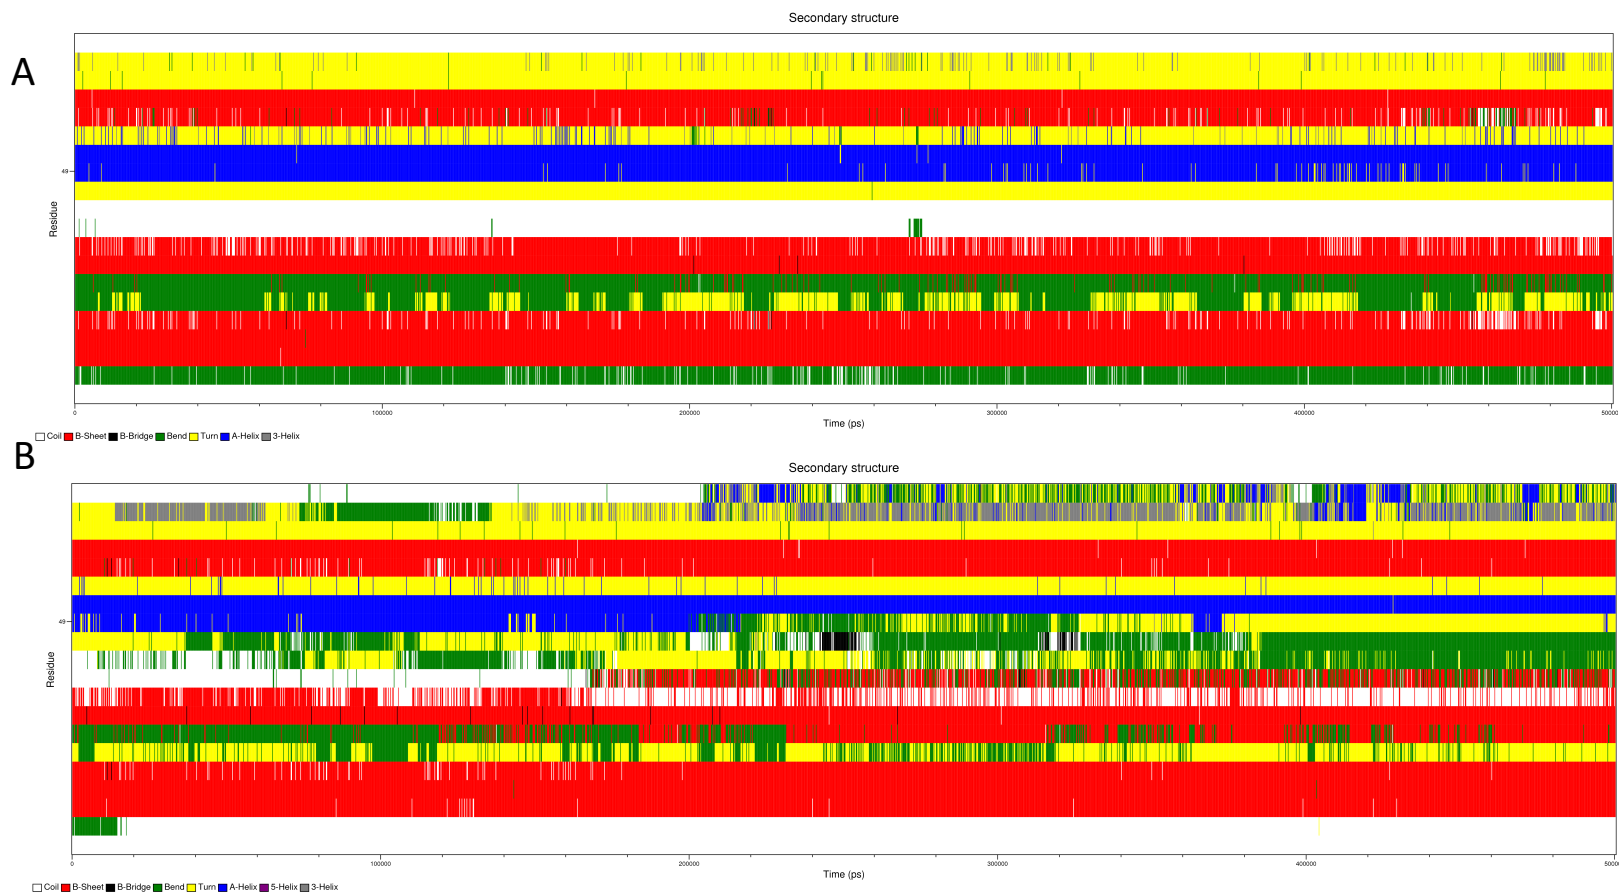

**Figure S1.** Representative DSSP plots for residues 1202-1282 of (A) Wild type (WT) and (B) W1282X NBD2 as a function of simulation time (500 ns simulation). In these plots residue numbers are given on the y-axis and simulation time on the x-axis. Red, blue, green, yellow, black, and white color correspond to  $\beta$ -sheet,  $\alpha$ -helix, bend, turn,  $\beta$ -bridge, and coil secondary structure respectively.

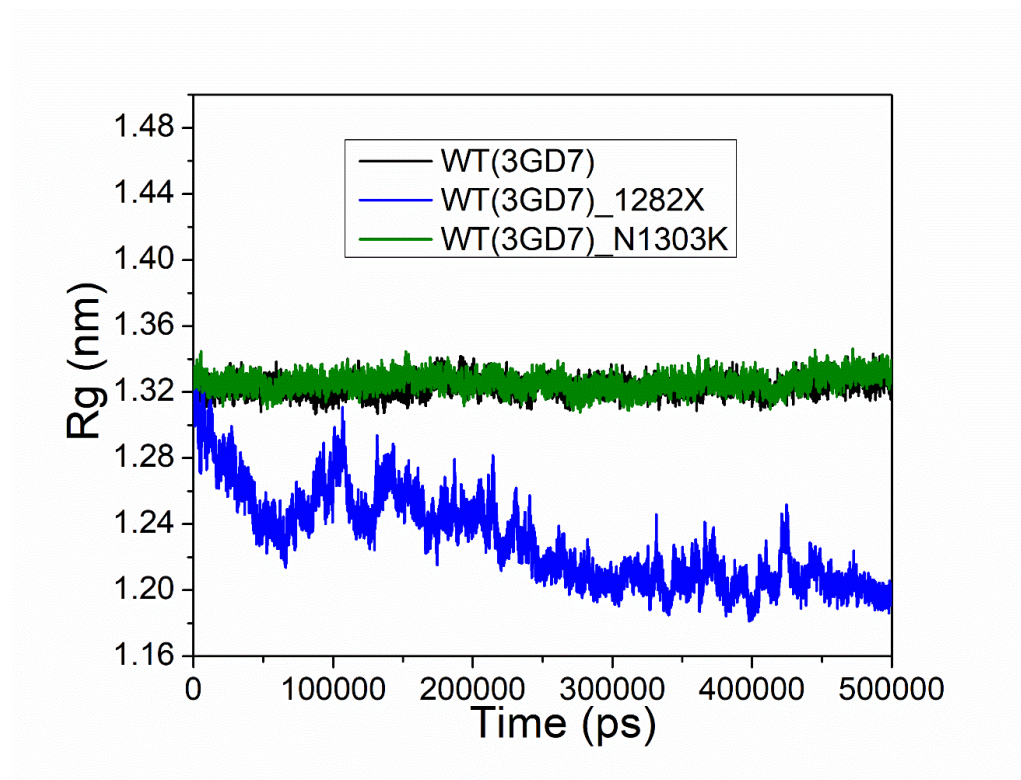

**Figure S2.** Average Rg values over three 500 ns simulations for residues 1202-1282 are shown. Black, blue and green lines correspond to the wild type, 1282X, and N1303K constructs, respectively. Low Rg values are indicative of a more compact construct.

A

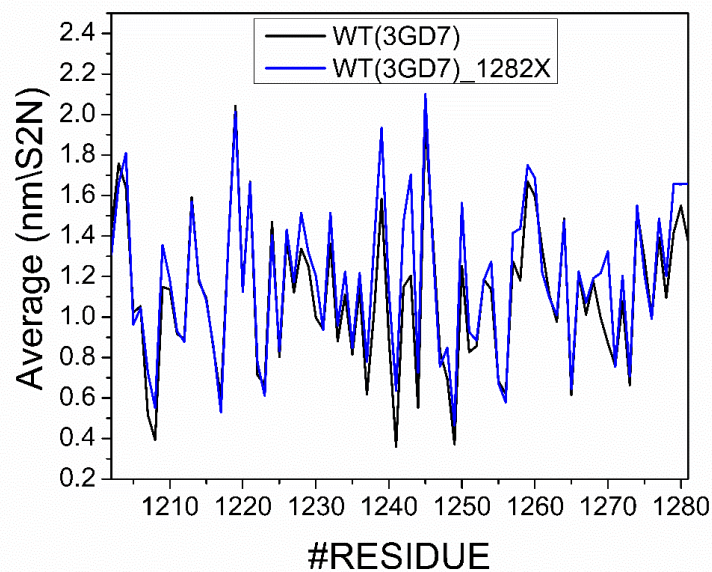

B

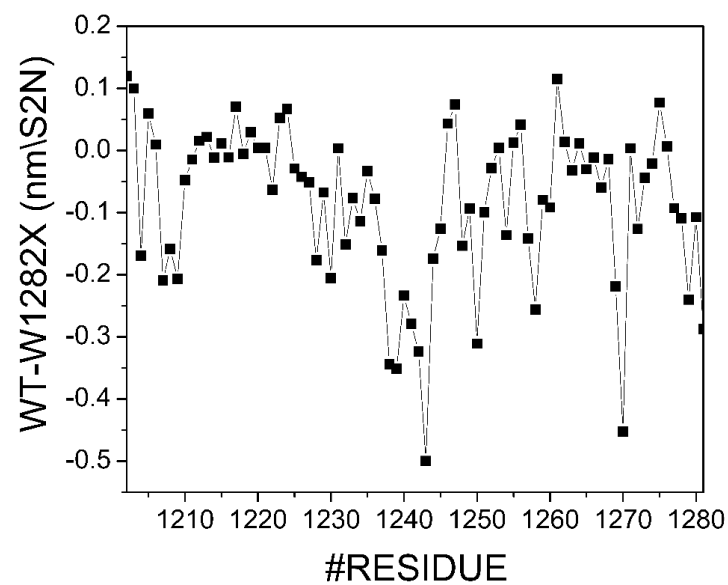

**Figure S3.** (A) SASA values averaged over three 500 ns simulations for residues 1202-1282 are shown. Black and blue lines correspond to the wild type and 1282X constructs, respectively. Low SASA values are indicative of a less exposed surface area. (B) Average differences plots (WT-1282X) over three 500 ns simulations are shown. Negative values indicate a more exposed SASA in the truncation mutant.

A

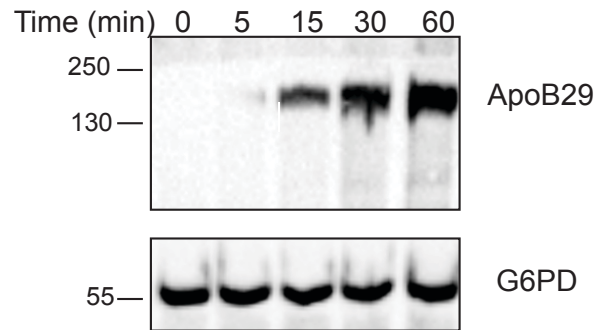

B

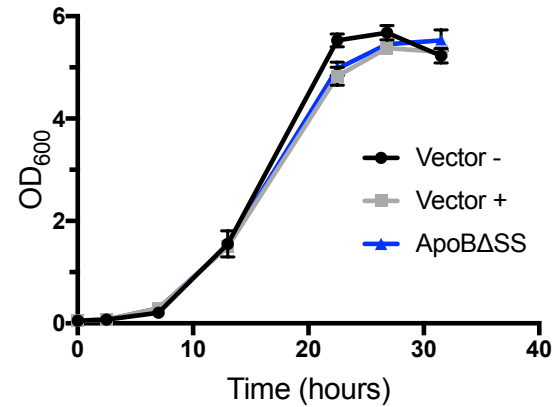

**Figure S4.** (A) Induction time-course for full-length ApoB29 expression in yeast transformed with the pYES2-ApoB29 expression vector. ApoB29 expression was monitored following the addition of  $\beta$ -estradiol at the indicated time-points. G6PD serves as a loading control. (B) Overnight yeast cultures transformed with an empty vector (Vector) or ApoB $\Delta$ SS were diluted to  $OD_{600}$  = 0.05 and growth was monitored over the indicated times in the presence (+) or absence (-) of  $\beta$ -estradiol.
